# Supplementary material for: Heat-Induced Release of Epigenetic Silencing Reveals the Concealed Role of an Imprinted Plant Gene
Source: PubMed Central journal article supplement (PMC4238952; doi:10.1371/journal.pgen.1004806), 2014-11-20

# Figure S3

**A**

Control  
Heat 5 cy

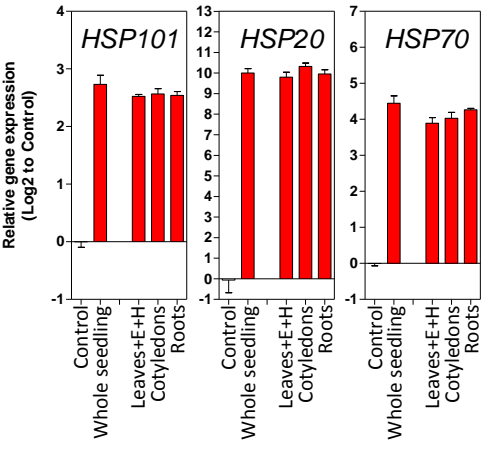

**B**

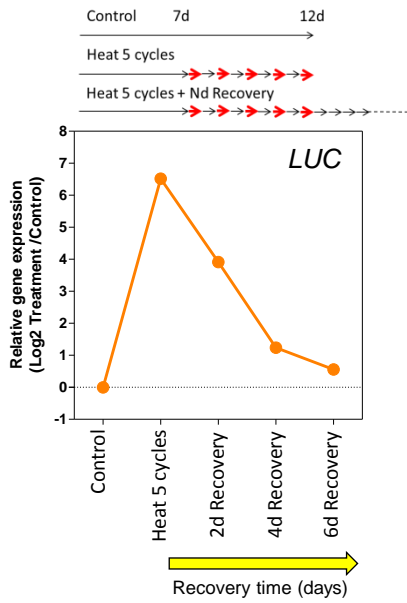

**C**

5 cycles heat 20 days old      +2d recovery 22 days old      +4d recovery 24 days old      +6d recovery 26 days old

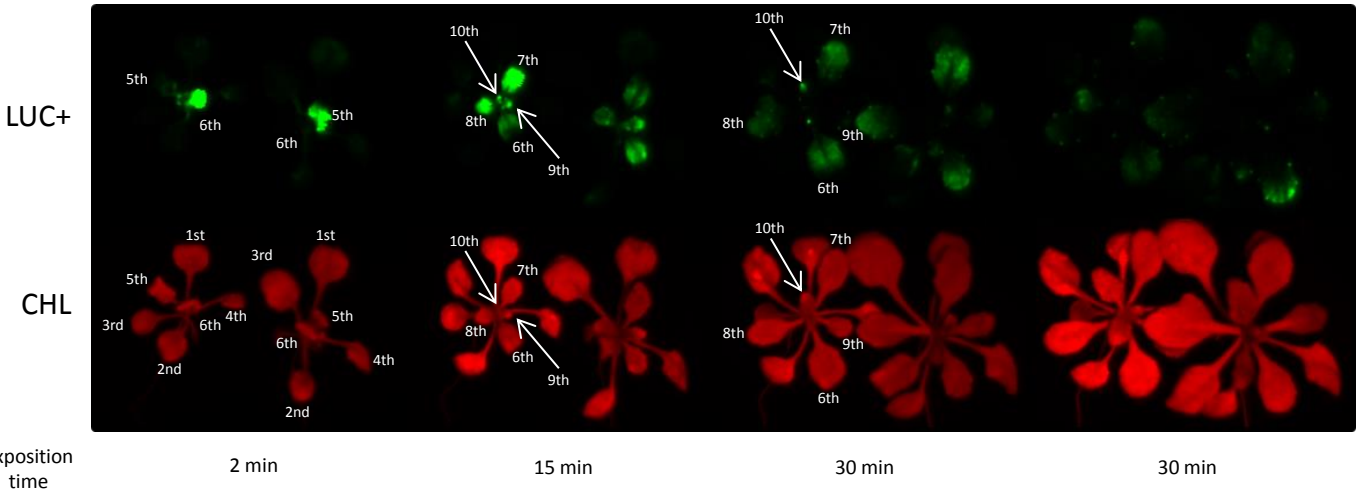

Supplement: pgen.1004806.s003.pdf [file pgen.1004806.s003.pdf]
