# Supplementary material for: Heat-Induced Release of Epigenetic Silencing Reveals the Concealed Role of an Imprinted Plant Gene
Source: PubMed Central journal article supplement (PMC4238952; doi:10.1371/journal.pgen.1004806), 2014-11-20

Figure S4

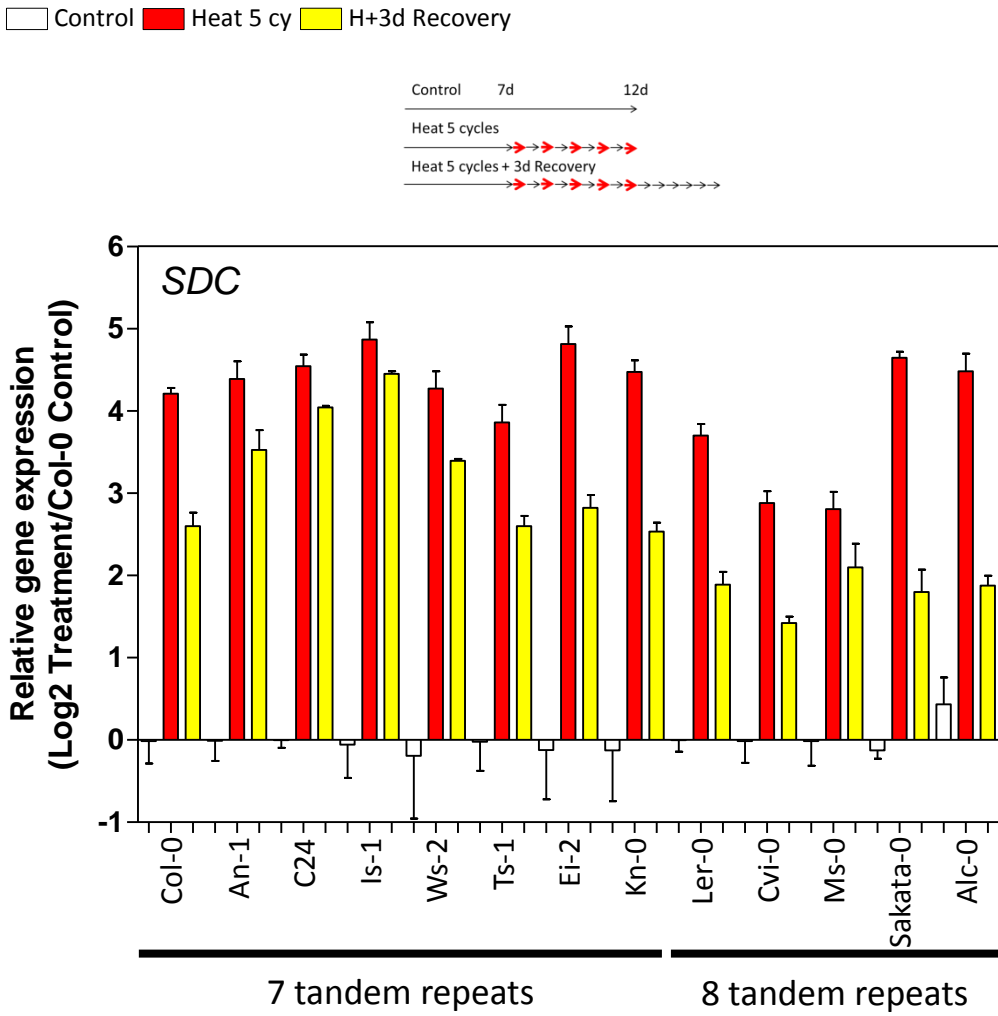

Supplement: pgen.1004806.s004.pdf [file pgen.1004806.s004.pdf]
