# Supplementary material for: Heat-Induced Release of Epigenetic Silencing Reveals the Concealed Role of an Imprinted Plant Gene
Source: PubMed Central journal article supplement (PMC4238952; doi:10.1371/journal.pgen.1004806), 2014-11-20
Supplement: pgen.1004806.s007.pdf [file pgen.1004806.s007.pdf]

Figure S7

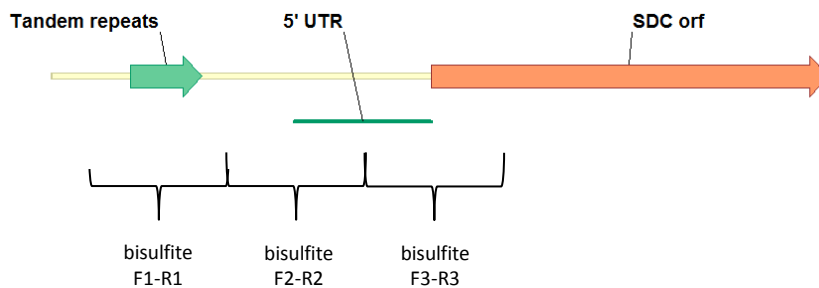

CG   
 CHG   
 CHH 

bisulfite  
F1-R1

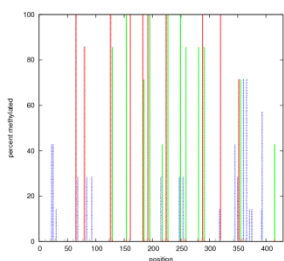

bisulfite  
F2-R2

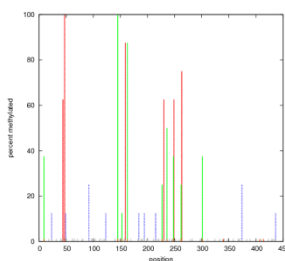

bisulfite  
F3-R3

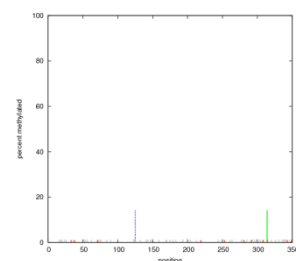

Control

Heat

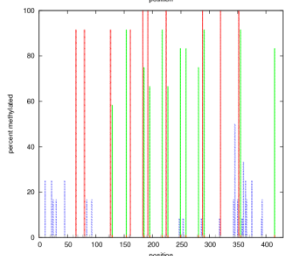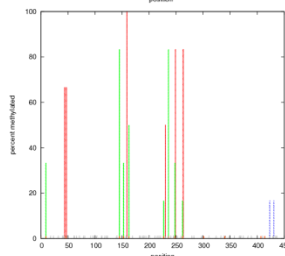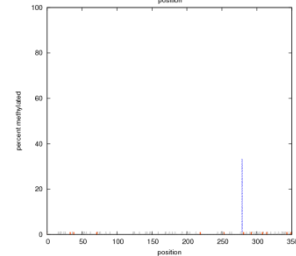

Overall Statistics CONTROL  
 CG total methylated=95.71%  
 CHG total methylated=80.95%  
 CHH total methylated=15%

Overall Statistics CONTROL  
 CG total methylated=64.28%  
 CHG total methylated=31.73%  
 CHH total methylated=2.02%

Overall Statistics CONTROL  
 CG total methylated= 0%  
 CHG total methylated= 1.29%  
 CHH total methylated= 0.28%

Overall Statistics HEAT  
 CG total methylated=96.66%  
 CHG total methylated=79.86%  
 CHH total methylated=10%

Overall Statistics HEAT  
 CG total methylated=64.28%  
 CHG total methylated=26.92%  
 CHH total methylated=0.49%

Overall Statistics HEAT  
 CG total methylated= 0%  
 CHG total methylated= 0%  
 CHH total methylated=0.66%
